# Supplementary material
Source: Royal Society of Chemistry journal article supplement (doi:10.1039/d6cc02281b)
Supplement: d6cc02281b1.pdf [file d6cc02281b1.pdf]

## Supporting Information

### **Soft chiral-bridged binuclear Pt(II) complexes with cyclometalated N-heterocyclic carbene ligands for multicolor circularly polarized luminescence**

Bao Zhang,<sup>a†</sup> Mingliang Chen,<sup>a†</sup> Wenjing Dong,<sup>a</sup> Shuo Wang,<sup>a</sup> Bo Tu,<sup>a</sup> Jintong Song

<sup>\*b</sup> and Haifeng Xiang <sup>\*a</sup>

---

<sup>a</sup> B Zhang, M Chen, W Dong, S Wang, B Tu, Prof. H. F. Xiang

College of Chemistry

Sichuan University

Chengdu, 610064, China

xianghaifeng@scu.edu.cn (H.X.)

<sup>b</sup> Prof. J. T. Song,

College of Chemistry and Materials Science

Sichuan Normal University

Chengdu, 610068, China

jintongsong@sicnu.edu.cn (S.J.)

<sup>†</sup> These authors contributed equally to this work.

## Table of Contents

|                                                    |     |
|----------------------------------------------------|-----|
| Section S1. Experimental Section.....              | S3  |
| S1.1 Materials and Instruments.....                | S3  |
| S1.2 General Experimental Details.....             | S3  |
| Section S2. Synthesis Characterizations.....       | S6  |
| Section S3. Table in supporting information.....   | S14 |
| Section S4. Figures in supporting information..... | S18 |
| Reference.....                                     | S25 |

## Section S1. Experimental Section

### S1.1 Materials and Instruments

All reagents used in the experiment were purchased from *J&K Scientific* and *Energy Chemical* in this work.

The instrumental information used for characterizations in this work.

| Characterization items                    | Type                                                             | Manufacturer                      |
|-------------------------------------------|------------------------------------------------------------------|-----------------------------------|
| UV/Vis absorption spectra                 | U5100                                                            | Hitachi                           |
| Phosphorescence                           | F-7000 Fluorescence spectrophotometer                            | Hitachi                           |
| Phosphorescence quantum yield             | Edinburgh FLS1000 Spectrofluorophotometer                        | Edinburgh analytical instrument   |
| Phosphorescence lifetime                  | Edinburgh FLS1000                                                | Edinburgh analytical instrument   |
| $^1\text{H}$ NMR and $^{13}\text{C}$ NMR  | Nuclear Magnetic Resonance Spectrometer (400 MHz, AVANCE III HD) | Bruker, Germany                   |
| CD spectra                                | CD-250 Chirascan-plus spectrophotometer                          | Applied Photophysics Limited, U.K |
| Circularly Polarized Luminescence spectra | CPL-300                                                          | JASCO, Japan                      |
| CCD X-ray single crystal diffractometer   | Bruker D8 VENTURE                                                | Bruker, Germany                   |

### S1.2 General Experimental Details

**Materials and Instrumentation.** All reagents were purchased from commercial suppliers and used without further purification.  $^1\text{H}$  NMR (400 MHz) spectra were recorded in  $\text{CDCl}_3$ . Chemical shifts are reported in ppm using tetramethylsilane as the internal standard. UV/Vis absorption spectra were recorded on a U-5100 (Hitachi) spectrophotometer with quartz cuvettes of 1 cm path length. Fluorescence spectra were obtained on an F-7000 fluorescence spectrophotometer (Hitachi) at room

temperature. Samples in solution and powder were contained in 1 cm path length quartz cuvettes (3.5 mL volume) and quartz tubes, respectively. Emission decay lifetime experiments were performed on an Edinburgh FLS1000 (Edinburgh Analytical Instruments). CD spectra were recorded on a CD-250 Chirascan Plus spectrophotometer at room temperature. CPL spectra were recorded on a JASCO CPL-300 spectrofluoropolarimeter at room temperature. High-resolution mass spectra (HR-MS) were obtained on a SCIEX X500R QTOF.

**Measurement of Fluorescence Quantum Yield ( $\Phi$ ).** The quantum yield was measured by an integrating sphere.

**CPL measurements. Sample preparation:** Dissolve 5 mg of the binuclear Pt(II) complex and 95 mg of PMMA in 4 ml of 1,2-dichloroethane by sonicating for 20 min. Each of the obtained solutions was uniformly coated onto a separate 2 cm  $\times$  2 cm  $\times$  1 mm quartz slide using a glass dropper. The solvent was allowed to evaporate overnight at ambient temperature to obtain the desired thin film samples.

**Measurement parameters and procedure:** The quartz slide sample was horizontally attached to a cylindrical holder so that the light path passed perpendicularly through the quartz slide. The detailed measurement parameters are as follows: Ex wavelength 370 nm; Measure range 750 - 440 nm; Data pitch 0.1 nm; CD scale 10000 mdeg/1.0 dOD; D.I.T. 2 sec; Ex bandwidth 40.00 nm; Em bandwidth 20.00 nm; Scanning speed 200 nm/min.

**Computational Details.** DFT and TD-DFT calculations (PBE1PBE/6-31g\*(C,H,N,O,S,F)/SDD(Pt)/PCM) were done by Gaussian 09 software. The ground-state geometry was optimized by DFT based on the X-ray single-crystal structure of Pt(II) complexes. After that, the optimized structure was used to calculate the UV/vis absorption by TD-DFT (DCM as the solvent, pcm method, 100 singlet-singlet transitions).

**Chirality High-Performance Liquid Chromatography.** Conditions for **(*R,Sp,R*)/(*S,Rp,S*)-PtF**: column: DAICEL Chiralpak IA; mobile phase: n-hexane / dichloromethane = 2 / 1; flow rate = 1.0 mL / min; temperature: 35°C. Conditions for **(*R,Sp,R*)/(*S,Rp,S*)-PtH** and **(*R,Sp,R*)/(*S,Rp,S*)-PtO**: column: DAICEL Chiralpak IA; mobile phase: n-hexane / dichloromethane = 1 / 1; flow rate = 1.0 mL / min; temperature: 35°C.

**Preparation of a 5% PMMA films.** Dissolve 5 mg of the binuclear Pt(II) complex and 95 mg of PMMA in 4 ml of 1,2-dichloroethane by sonicating for 20 min. Coat the resulting solution uniformly onto a 1×1 cm quartz slide and allow the solvent to evaporate overnight at ambient temperature to obtain the desired thin film sample.

**Method for crystal growth.** Dissolve 5 mg of the binuclear Pt(II) complex in 2 mL of dichloromethane in a test tube. Slowly add 10 mL of petroleum ether along the tube wall to form a solution boundary. Suitable crystal for testing is obtained via liquid-phase diffusion and solvent evaporation.

## Section S2. Synthesis Characterizations

(*R*)/(*S*)-4-Methyl-2-thiazolidinethione, Imidazolium salt were synthesized according to the reported literature<sup>[1-4]</sup>.

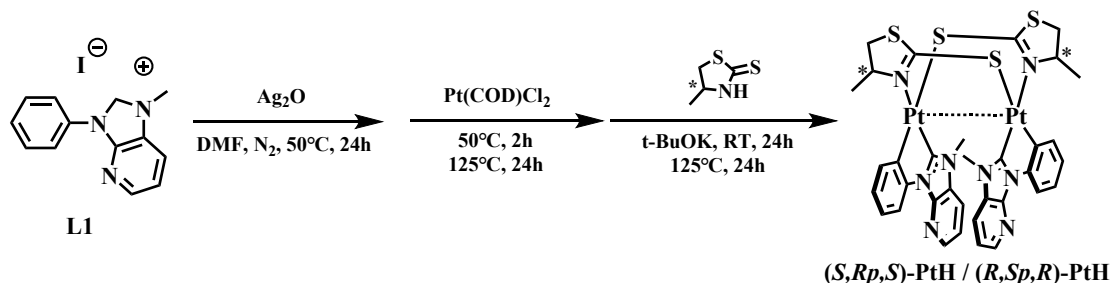

**(*R,Sp,R*)-PtH:** L1 (1.00 mmol, 0.34 g) and silver(I) oxide (0.60 mmol, 0.14g) were added to a 2-neck flask. After addition of dry DMF (10 mL), the reaction mixture was stirred under argon atmosphere for 24 h at 50 °C in the absence of light. 1,5-Cyclooctadieneplatinum(II) Dichloride (1.00 mmol, 0.37 g) was then added, and the mixture was stirred for a further 2 h at 50 °C, then for 24 h at 125 °C. Afterwards, potassium *tert*-butoxide (2.00 mmol, 0.22g) and (*R*)-4-Methyl-2-thiazolidinethione (2.00 mmol, 0.26 g) were added and the mixture was stirred for 24 h at room temperature and then for a further 24 h at 100 °C. After the reaction was cooled to room temperature, all volatiles were removed under reduced pressure. The crude product was purified by column chromatography (200-300 mesh silica gel powder, PE:DCM = 1:1 (v/v)) to afford pure products. The yields of (***R,Sp,R***)-PtH is 21% (112.46 mg, red powder).

### **(*R,Sp,R*)-PtH**

<sup>1</sup>H NMR (400 MHz, Chloroform-*d*) δ 7.97 (dd, *J* = 4.8, 1.4 Hz, 2H), 7.79 (dd, *J* = 7.7, 1.5 Hz, 2H), 7.43 (dd, *J* = 7.3, 1.6 Hz, 2H), 7.31 (dd, *J* = 8.1, 1.4 Hz, 2H), 7.15 (dd, *J* = 8.1, 4.9 Hz, 2H), 7.08 (td, *J* = 7.4, 1.6 Hz, 2H), 7.03 (td, *J* = 7.3, 1.5 Hz, 2H), 4.91 (dp, *J* = 12.1, 6.7 Hz, 2H), 3.58 (dd, *J* = 10.9, 7.3 Hz, 2H), 3.31 (t, *J* = 11.2 Hz, 2H), 3.21 (s, 6H), 1.69 (d, *J* = 6.6 Hz, 6H).

<sup>13</sup>C NMR (101 MHz, Chloroform-*d*) δ 180.50, 146.16, 144.37, 143.74, 136.75, 134.25, 127.35, 124.95, 123.65, 118.06, 118.04, 113.71, 77.37, 72.09, 41.95, 33.34, 21.65.

**HRMS** (ESI) *m/z*: [M + H]<sup>+</sup> Calcd for C<sub>34</sub>H<sub>33</sub>N<sub>8</sub>Pt<sub>2</sub>S<sub>4</sub> 1070.0907; Found 1070.0916

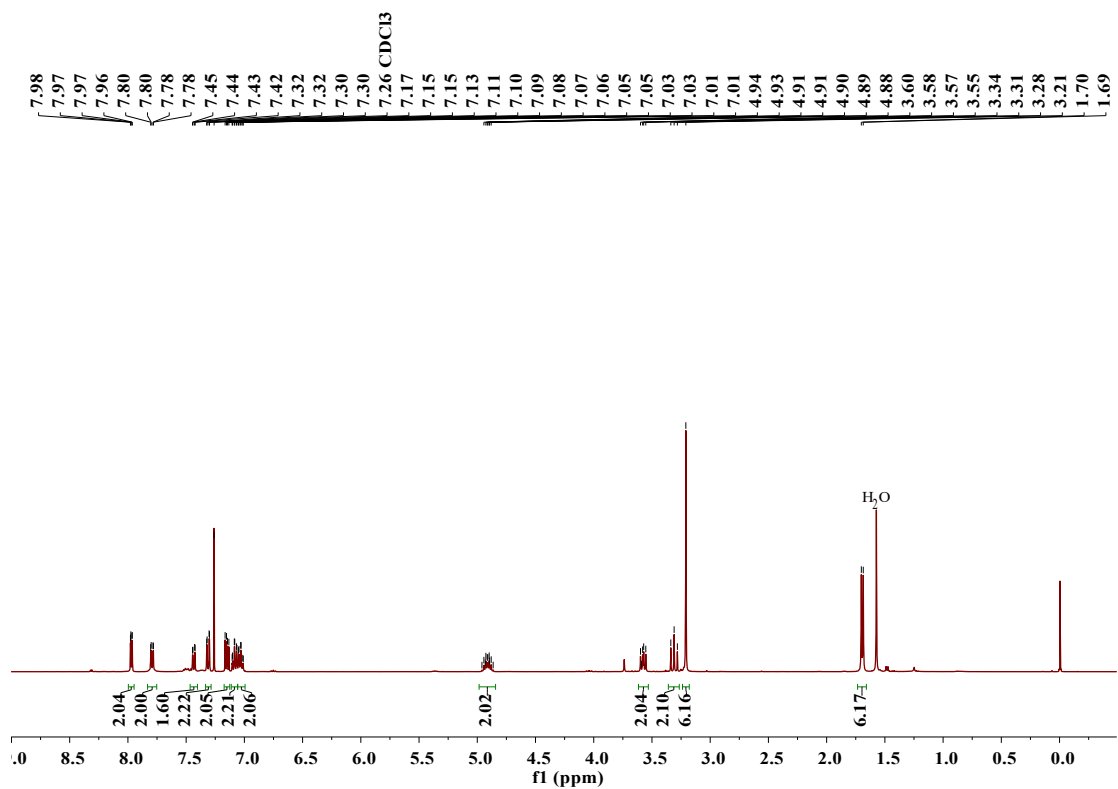

<sup>1</sup>H NMR (400 MHz) of (*R,Sp,R*)-PtH in CDCl<sub>3</sub>-d<sup>1</sup>

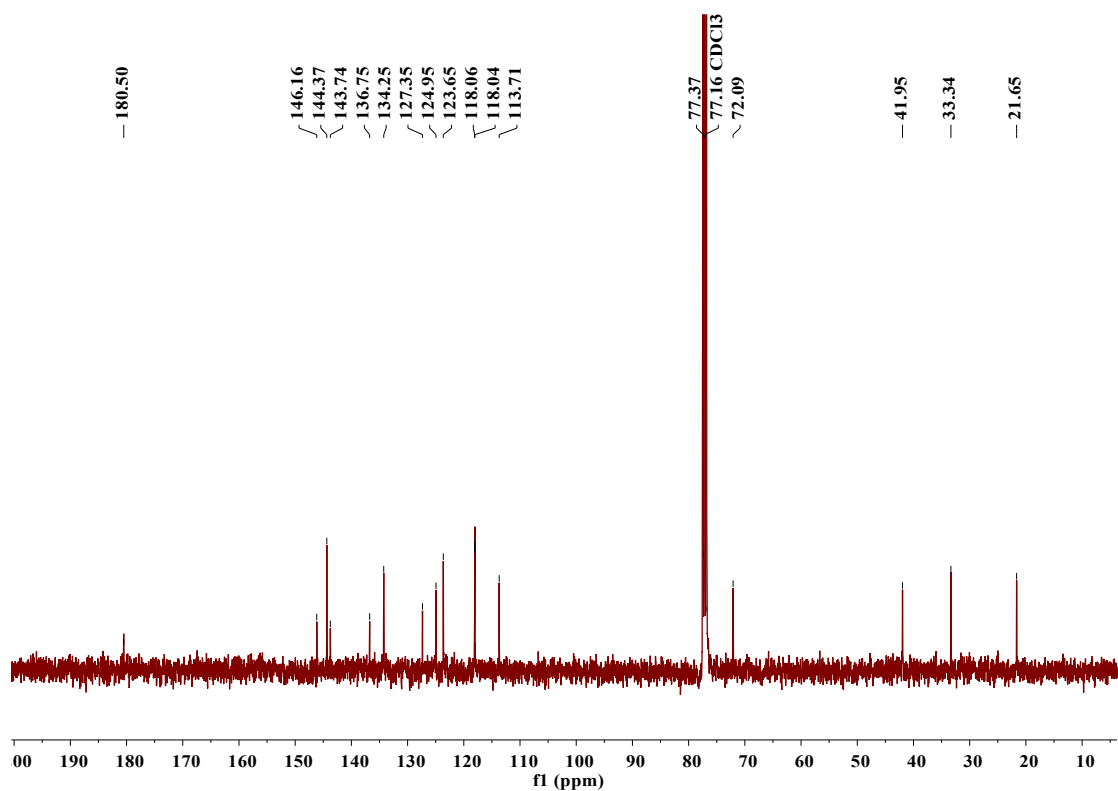

<sup>13</sup>C NMR (101 MHz) of (*R,Sp,R*)-PtH in CDCl<sub>3</sub>-d<sup>1</sup>

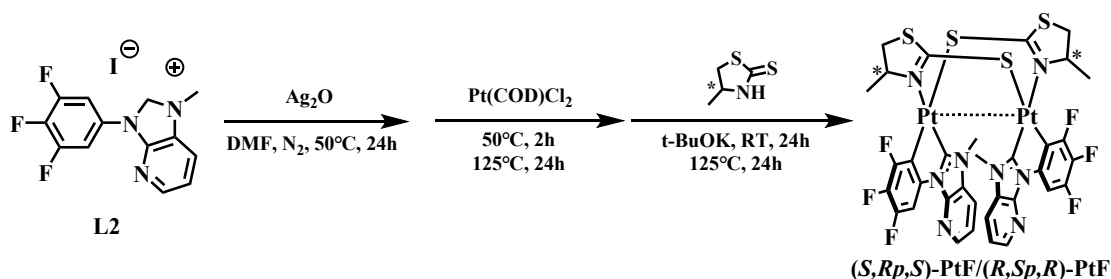

**(*R,Sp,R*)-PtF:** L2 (1.00 mmol, 0.39 g) and silver(I) oxide (0.60 mmol, 0.14g) were added to a 2-neck flask. After addition of dry DMF (10 mL), the reaction mixture was stirred under argon atmosphere for 24 h at 50 °C in the absence of light. 1,5-Cyclooctadieneplatinum(II) Dichloride (1.00 mmol, 0.37 g) was then added, and the mixture was stirred for a further 2 h at 50 °C, then for 24 h at 125 °C. Afterwards, potassium *tert*-butoxide (2.00 mmol, 0.22g) and (*R*)-4-Methyl-2-thiazolidinethione (2.00 mmol, 0.26 g) were added and the mixture was stirred for 24 h at room temperature and then for a further 24 h at 100 °C. After the reaction was cooled to room temperature, all volatiles were removed under reduced pressure. The crude product was purified by column chromatography (200-300 mesh silica gel powder, PE:DCM = 2:1 (v/v)) to afford pure products. The yields of (*R,Sp,R*)-PtF is 27% (158.90 mg, orange powder).

#### **(*R,Sp,R*)-PtF**

<sup>1</sup>H NMR (400 MHz, Chloroform-*d*) δ 8.09 (dd, *J* = 4.9, 1.4 Hz, 2H), 7.61 (ddd, *J* = 10.7, 6.0, 2.0 Hz, 2H), 7.45 (dd, *J* = 8.2, 1.4 Hz, 2H), 7.27 (d, *J* = 4.9 Hz, 2H), 4.87 (dtt, *J* = 17.9, 7.7, 3.9 Hz, 2H), 3.57 (s, 6H), 3.42 – 3.33 (m, 4H), 1.72 (d, *J* = 6.4 Hz, 6H).

<sup>13</sup>C NMR (101 MHz, Chloroform-*d*) δ 179.77, 164.75, 164.08, 144.92, 143.50, 140.90, 127.65, 119.05, 118.50, 118.09, 99.33, 77.36, 72.10, 40.78, 34.10, 20.86.

<sup>19</sup>F NMR (376 MHz, Chloroform-*d*) δ -123.21 (d, *J* = 26.0 Hz), -138.75 – -145.51 (m), -160.08 – -169.78 (m).

**HRMS** (ESI) *m/z*: [*M* + *H*]<sup>+</sup> Calcd for C<sub>34</sub>H<sub>27</sub>F<sub>6</sub>N<sub>8</sub>Pt<sub>2</sub>S<sub>4</sub> 1178.0342; Found 1178.0354

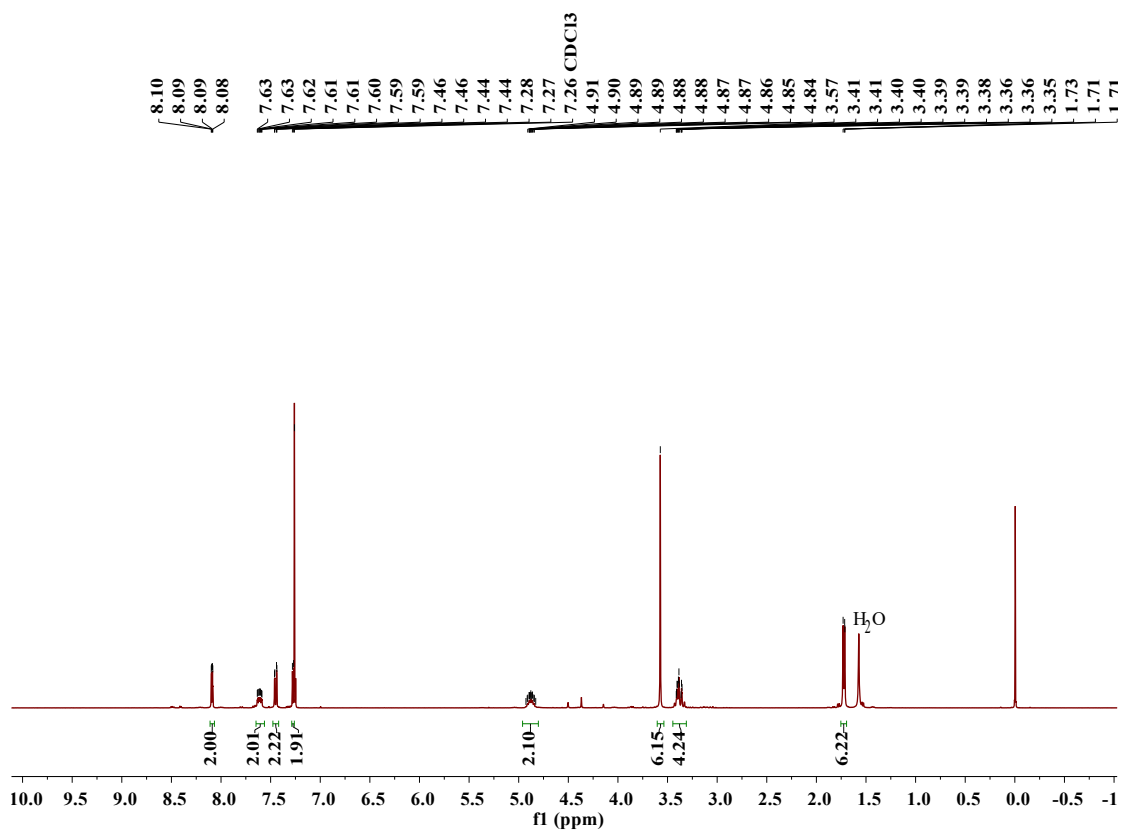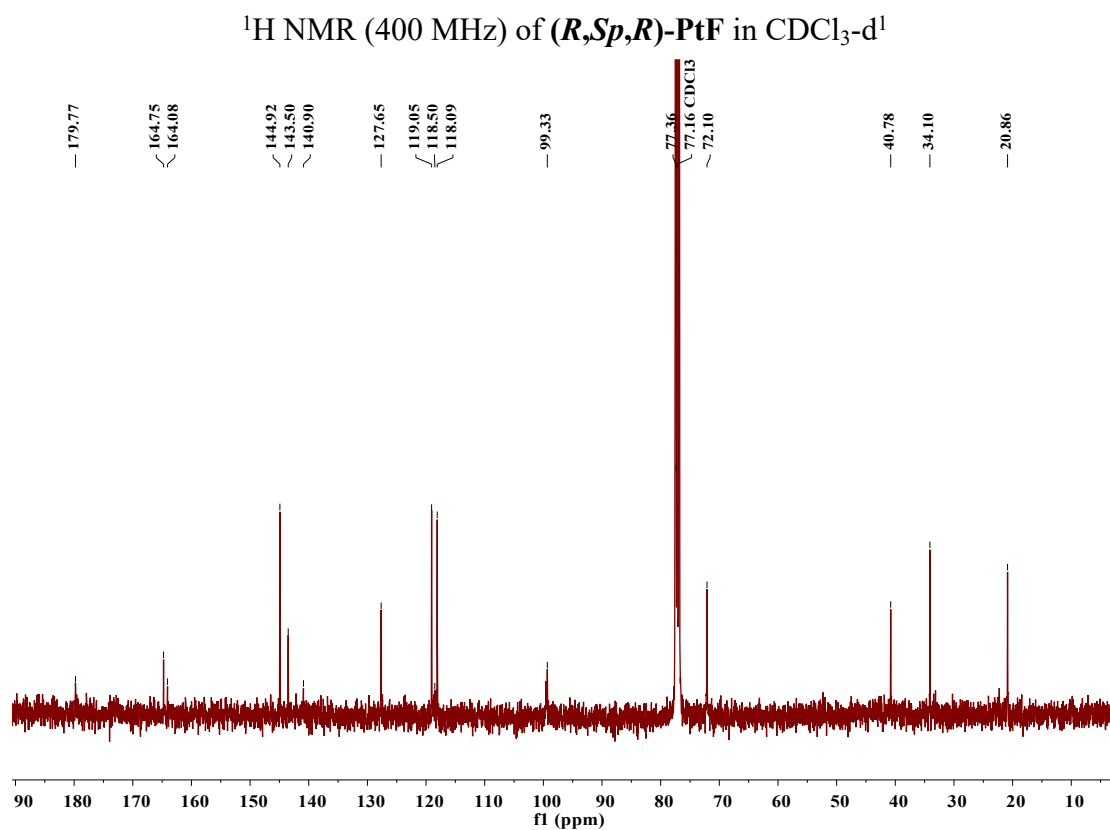

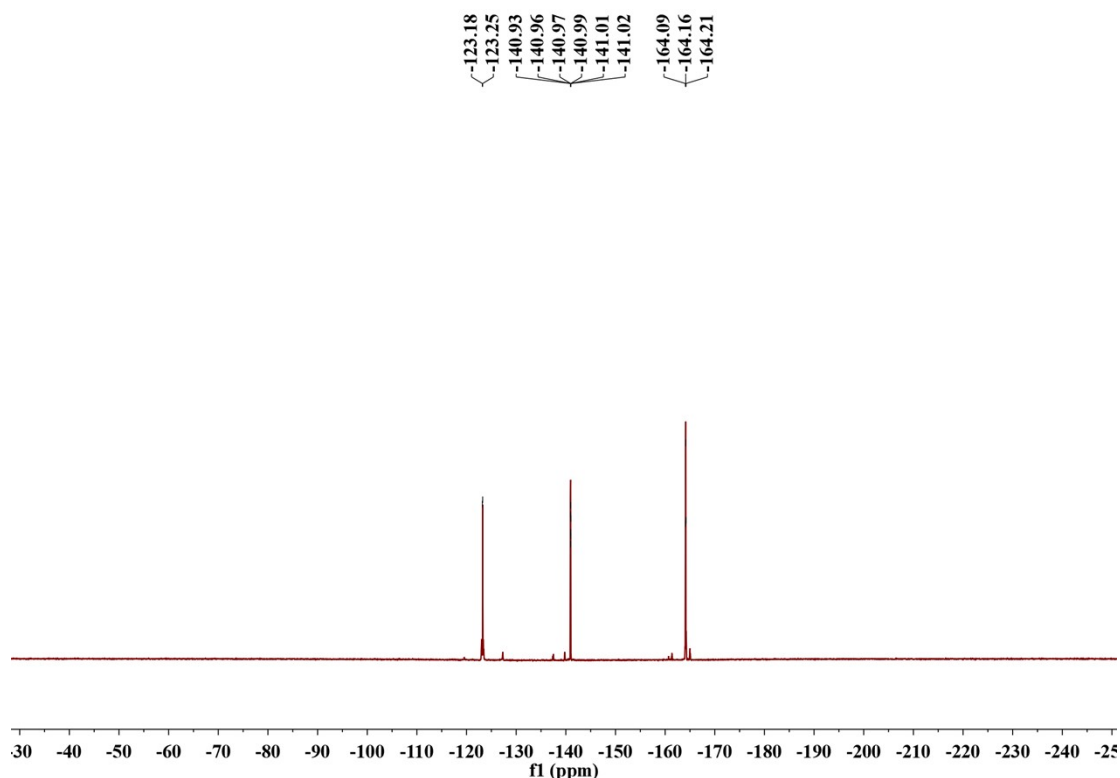

$^{19}\text{F}$  NMR (376 MHz) of (*R,Sp,R*)-PtF in  $\text{CDCl}_3\text{-d}^1$

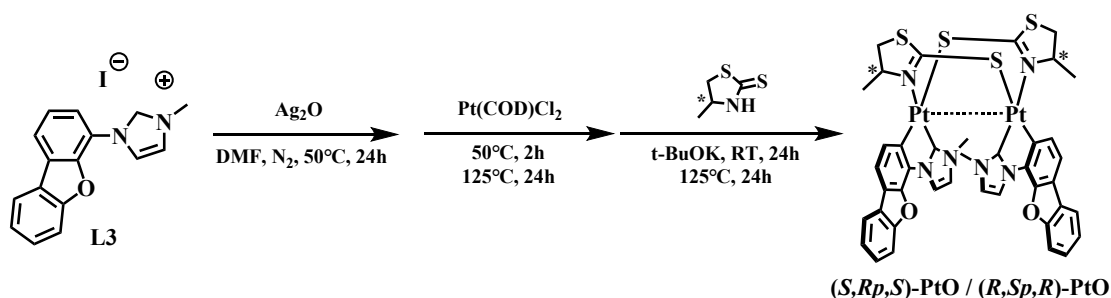

**(*R,Sp,R*)-PtO:** L3 (1.00 mmol, 0.38 g) and silver(I) oxide (0.60 mmol, 0.14g) were added to a 2-neck flask. After addition of dry DMF (10 mL), the reaction mixture was stirred under argon atmosphere for 24 h at 50 °C in the absence of light. 1,5-Cyclooctadieneplatinum(II) Dichloride (1.00 mmol, 0.37 g) was then added, and the mixture was stirred for a further 2 h at 50 °C, then for 24 h at 125 °C. Afterwards, potassium *tert*-butoxide (2.00 mmol, 0.22g) and (*R*)-4-Methyl-2-thiazolidinethione (2.00 mmol, 0.26 g) were added and the mixture was stirred for 24 h at room temperature and then for a further 24 h at 100 °C. After the reaction was cooled to room temperature, all volatiles were removed under reduced pressure. The crude

product was purified by column chromatography (200-300 mesh silica gel powder, PE:DCM = 1:1 (v/v)) to afford pure products. The yields of **(R,Sp,R)-PtO** is 12% (68.94 mg, yellow powder).

### **(R,Sp,R)-PtO**

<sup>1</sup>H NMR (400 MHz, Chloroform-d) δ 7.94 (dt, J = 7.2, 1.1 Hz, 2H), 7.65 (d, J = 2.0 Hz, 2H), 7.59 – 7.54 (m, 4H), 7.46 (ddd, J = 8.2, 7.2, 1.4 Hz, 2H), 7.39 – 7.34 (m, 4H), 5.97 (d, J = 2.0 Hz, 2H), 4.90 (dp, J = 10.7, 6.7 Hz, 2H), 3.59 (dd, J = 10.9, 7.3 Hz, 2H), 3.29 (t, J = 10.9 Hz, 2H), 2.93 (s, 6H), 1.70 (d, J = 6.6 Hz, 6H).

<sup>13</sup>C NMR (101 MHz, Chloroform-d) δ 155.73, 154.68, 142.56, 137.75, 129.62, 129.30, 126.38, 124.92, 123.10, 121.72, 120.49, 120.40, 117.15, 116.22, 111.50, 77.33, 72.08, 41.77, 37.05, 21.72.

HRMS (ESI) m/z: [M + H]<sup>+</sup> Calcd for C<sub>40</sub>H<sub>37</sub>N<sub>6</sub>O<sub>2</sub>Pt<sub>2</sub>S<sub>4</sub> 1150.1057; Found 1150.1073

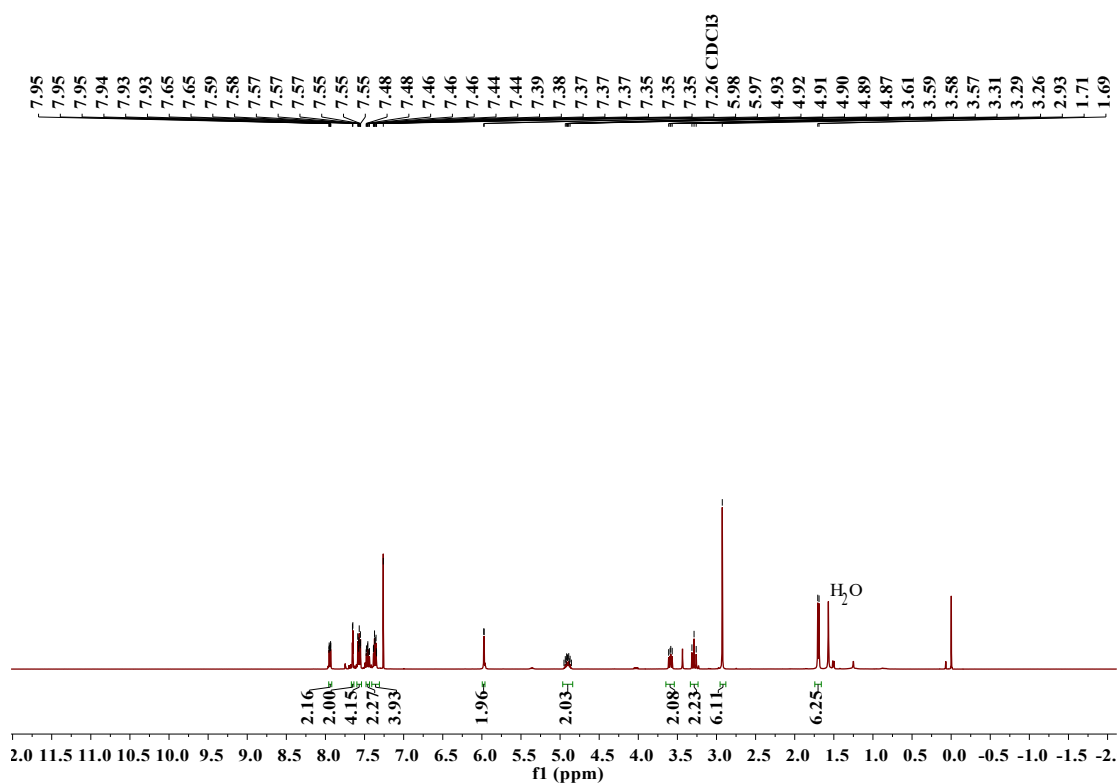

<sup>1</sup>H NMR (400 MHz) of **(R,Sp,R)-PtO** in CDCl<sub>3</sub>-d<sup>1</sup>

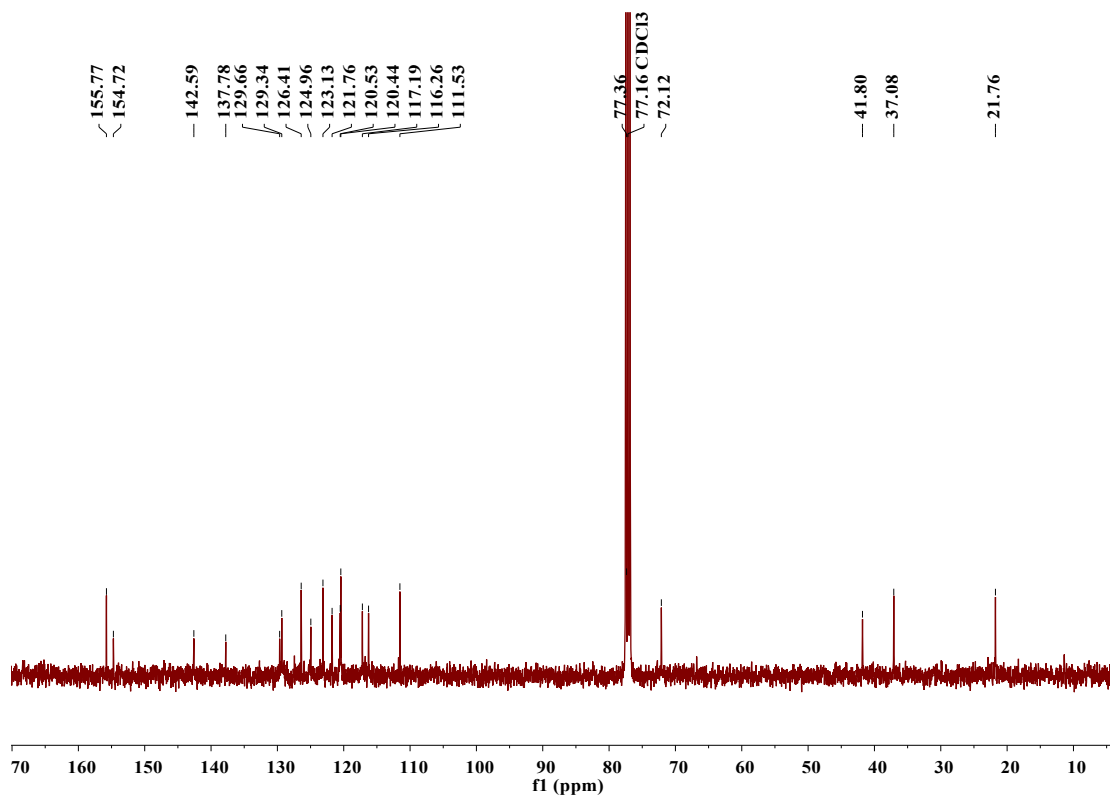

$^{13}\text{C}$  NMR (101 MHz) of (*R,Sr,R*)-PtO in  $\text{CDCl}_3\text{-d}^1$

## HR-ESI-MS spectra

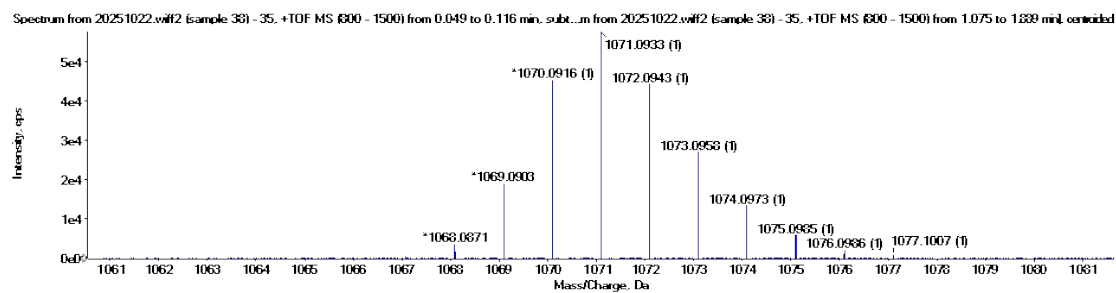

HR-ESI-MS spectrum (positive ion mode) of  $(R,Sp,R)$ -PtH

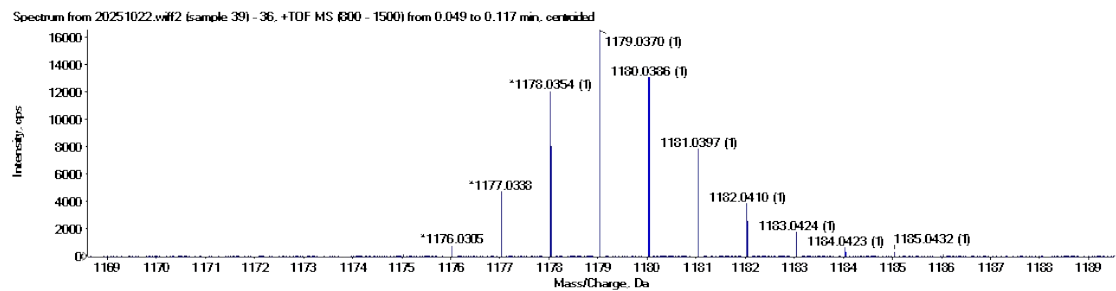

HR-ESI-MS spectrum (positive ion mode) of  $(R,Sp,R)$ -PtF

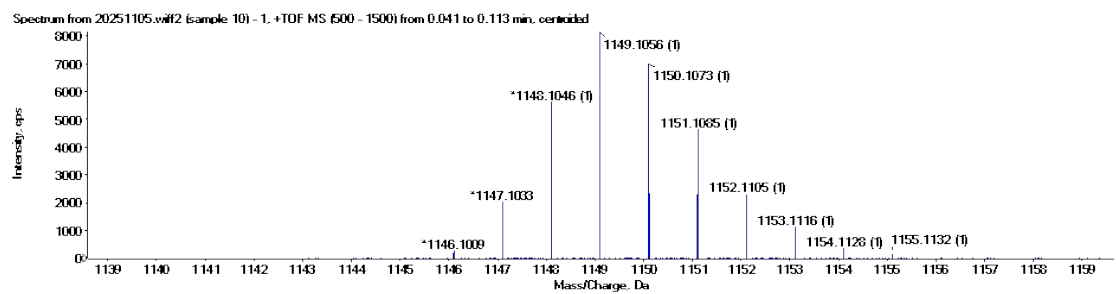

HR-ESI-MS spectrum (positive ion mode) of  $(R,Sp,R)$ -PtO

## Section S3. Table in supporting information.

**Table S1.** Comparison of photophysical properties between binuclear Pt(II) complexes and mononuclear Pt(II) complexes.

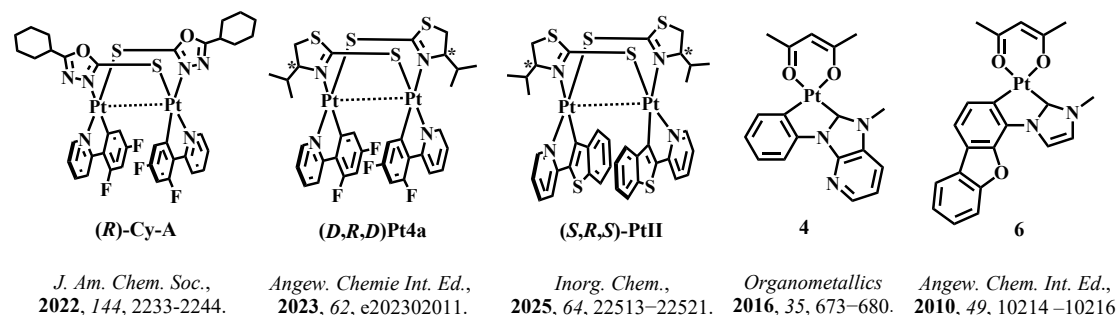

| Compounds    | medium         | $\lambda_{em}$<br>(nm) | FWHM<br>(nm) | $\Phi$<br>(%) | $\tau$<br>( $\mu$ s) | transition<br>type | $g_{lum}$<br>$\times 10^{-3}$ |
|--------------|----------------|------------------------|--------------|---------------|----------------------|--------------------|-------------------------------|
| (R)-Cy-A     | 10 wt % in mCP | 603                    | ~100         | 83            | 3.22                 | MMLCT              | 2.4                           |
| (D,R,D)Pt4a  | 8 wt % in mCP  | 610                    | ~100         | 100           | 3.01                 | MMLCT              | 1.8                           |
| (S,R,S)-PtII | 5 wt % in PMMA | 634, 676               | ~90          | 84            | 4.90                 | MMLCT              | /                             |
| (R,Sp,R)-PtH | 5 wt % in PMMA | <b>584</b>             | <b>61</b>    | 66            | <b>1.70</b>          | MMLCT              | 1.1                           |
| (R,Sp,R)-PtF | 5 wt % in PMMA | <b>567</b>             | <b>53</b>    | 71            | <b>1.54</b>          | MMLCT              | 1.9                           |
| (R,Sp,R)-PtO | 5 wt % in PMMA | <b>549</b>             | <b>50</b>    | 36            | <b>1.78</b>          | MMLCT              | 1.7                           |
| 4            | 2 wt % in PMMA | 452, 458; 548          | ~180         | 64            | 4.8                  | MLCT               | /                             |
| 6            | 2 wt % in PMMA | 463, 497               | ~50          | 90            | 23                   | MLCT               | /                             |

**Table S2.** Experimental  $g_{PL}$  values of binuclear Pt(II) complexes.

| Compounds (5 wt% PMMA film) | $g_{lum} \times 10^{-3}$ |
|-----------------------------|--------------------------|
| (R,Sp,R)-PtH / (S,Rp,S)-PtH | 1.07 / -1.33             |
| (R,Sp,R)-PtF / (S,Rp,S)-PtF | 1.90 / -2.33             |
| (R,Sp,R)-PtO / (S,Rp,S)-PtO | 1.71 / -1.70             |

**Table S3:** Crystallographic data for (*Rac*)-PtH.

| Compound                                    | ( <i>Rac</i> )-PtH                                                                            |
|---------------------------------------------|-----------------------------------------------------------------------------------------------|
| CCDC #                                      | 2505760                                                                                       |
| Empirical formula                           | C <sub>36</sub> H <sub>36</sub> Cl <sub>4</sub> N <sub>8</sub> Pt <sub>2</sub> S <sub>4</sub> |
| Formula weight                              | 1240.95                                                                                       |
| Temperature/K                               | 100.0(2)                                                                                      |
| Crystal system                              | monoclinic                                                                                    |
| Space group                                 | C2/c                                                                                          |
| a/Å                                         | 18.7524(2)                                                                                    |
| b/Å                                         | 15.8810(2)                                                                                    |
| c/Å                                         | 13.14550(10)                                                                                  |
| $\alpha$ /°                                 | 90                                                                                            |
| $\beta$ /°                                  | 90.5210(10)                                                                                   |
| $\gamma$ /°                                 | 90                                                                                            |
| Volume/Å <sup>3</sup>                       | 3914.66(7)                                                                                    |
| Z                                           | 4                                                                                             |
| $\rho_{\text{calc}}$ /cm <sup>3</sup>       | 2.106                                                                                         |
| $\mu$ /mm <sup>-1</sup>                     | 18.013                                                                                        |
| F(000)                                      | 2384.0                                                                                        |
| Crystal size/mm <sup>3</sup>                | 0.21×0.19×0.16                                                                                |
| Radiation                                   | Cu K $\alpha$ ( $\lambda$ = 1.54184)                                                          |
| 2 $\Theta$ range for data collection/°      | 7.294 to 133.124                                                                              |
| Index ranges                                | -21 ≤ h ≤ 22, -15 ≤ k ≤ 18, -13 ≤ l ≤ 15                                                      |
| Reflections collected                       | 16034                                                                                         |
| Independent reflections                     | 3415 [R <sub>int</sub> = 0.0543, R <sub>sigma</sub> = 0.0291]                                 |
| Data/restraints/parameters                  | 3415/54/247                                                                                   |
| Goodness-of-fit on F <sup>2</sup>           | 1.159                                                                                         |
| Final R indexes [I ≥ 2 $\sigma$ (I)]        | R <sub>1</sub> = 0.0373, wR <sub>2</sub> = 0.1058                                             |
| Final R indexes [all data]                  | R <sub>1</sub> = 0.0377, wR <sub>2</sub> = 0.1064                                             |
| Largest diff. peak/hole / e Å <sup>-3</sup> | 1.46/-2.34                                                                                    |

**Table S4:** Crystallographic data for **(*R,Sp,R*)-PtF**.

| Compound                                    | <b>(<i>R,Sp,R</i>)-PtF</b>                                                                                   |
|---------------------------------------------|--------------------------------------------------------------------------------------------------------------|
| CCDC #                                      | 2505761                                                                                                      |
| Empirical formula                           | C <sub>35</sub> H <sub>28</sub> Cl <sub>2</sub> F <sub>6</sub> N <sub>8</sub> Pt <sub>2</sub> S <sub>4</sub> |
| Formula weight                              | 1263.97                                                                                                      |
| Temperature/K                               | 150                                                                                                          |
| Crystal system                              | orthorhombic                                                                                                 |
| Space group                                 | P2 <sub>1</sub> 2 <sub>1</sub> 2 <sub>1</sub>                                                                |
| a/Å                                         | 7.7069(7)                                                                                                    |
| b/Å                                         | 18.5912(15)                                                                                                  |
| c/Å                                         | 28.355(2)                                                                                                    |
| α/°                                         | 90                                                                                                           |
| β/°                                         | 90                                                                                                           |
| γ/°                                         | 90                                                                                                           |
| Volume/Å <sup>3</sup>                       | 4062.7(6)                                                                                                    |
| Z                                           | 4                                                                                                            |
| ρ <sub>calc</sub> /cm <sup>3</sup>          | 2.066                                                                                                        |
| μ/mm <sup>-1</sup>                          | 16.413                                                                                                       |
| F(000)                                      | 2408                                                                                                         |
| Crystal size/mm <sup>3</sup>                | 0.08×0.06×0.04                                                                                               |
| Radiation                                   | Cu Kα (λ = 1.54184)                                                                                          |
| 2θ range for data collection/°              | 5.684 to 138.178                                                                                             |
| Index ranges                                | -8 ≤ h ≤ 7, -21 ≤ k ≤ 22, -34 ≤ l ≤ 33                                                                       |
| Reflections collected                       | 41358                                                                                                        |
| Independent reflections                     | 7227 [R <sub>int</sub> = 0.0544, R <sub>sigma</sub> = 0.0370]                                                |
| Data/restraints/parameters                  | 7227/3/492                                                                                                   |
| Goodness-of-fit on F <sup>2</sup>           | 1.061                                                                                                        |
| Final R indexes [I ≥ 2σ (I)]                | R <sub>1</sub> = 0.0320, wR <sub>2</sub> = 0.0782                                                            |
| Final R indexes [all data]                  | R <sub>1</sub> = 0.0343, wR <sub>2</sub> = 0.0786                                                            |
| Largest diff. peak/hole / e Å <sup>-3</sup> | 0.72/-1.21                                                                                                   |

**Table S5:** Crystallographic data for **(S,Rp,S)-PtO**.

| Compound                                    | <b>(S,Rp,S)-PtO</b>                                                                                          |
|---------------------------------------------|--------------------------------------------------------------------------------------------------------------|
| CCDC #                                      | 2505762                                                                                                      |
| Empirical formula                           | C <sub>41</sub> H <sub>36</sub> N <sub>6</sub> O <sub>2</sub> S <sub>4</sub> Cl <sub>2</sub> Pt <sub>2</sub> |
| Formula weight                              | 1234.08                                                                                                      |
| Temperature/K                               | 99.9(4)                                                                                                      |
| Crystal system                              | monoclinic                                                                                                   |
| Space group                                 | P2 <sub>1</sub>                                                                                              |
| a/Å                                         | 10.5038(2)                                                                                                   |
| b/Å                                         | 10.2969(2)                                                                                                   |
| c/Å                                         | 19.7181(3)                                                                                                   |
| α/°                                         | 90                                                                                                           |
| β/°                                         | 104.793(2)                                                                                                   |
| γ/°                                         | 90                                                                                                           |
| Volume/Å <sup>3</sup>                       | 2061.95(7)                                                                                                   |
| Z                                           | 2                                                                                                            |
| ρ <sub>calc</sub> /cm <sup>3</sup>          | 1.988                                                                                                        |
| μ/mm <sup>-1</sup>                          | 15.957                                                                                                       |
| F(000)                                      | 1188                                                                                                         |
| Crystal size/mm <sup>3</sup>                | 0.15×0.11×0.07                                                                                               |
| Radiation                                   | Cu Kα (λ = 1.54184)                                                                                          |
| 2θ range for data collection/°              | 4.636 to 154.486                                                                                             |
| Index ranges                                | -13 ≤ h ≤ 10, -12 ≤ k ≤ 12, -24 ≤ l ≤ 24                                                                     |
| Reflections collected                       | 16926                                                                                                        |
| Independent reflections                     | 16926 [R <sub>int</sub> = 0.1045, R <sub>sigma</sub> = 0.0210]                                               |
| Data/restraints/parameters                  | 16926/65/547                                                                                                 |
| Goodness-of-fit on F <sup>2</sup>           | 1.109                                                                                                        |
| Final R indexes [I ≥ 2σ (I)]                | R <sub>1</sub> = 0.0828, wR <sub>2</sub> = 0.2236                                                            |
| Final R indexes [all data]                  | R <sub>1</sub> = 0.0847, wR <sub>2</sub> = 0.2266                                                            |
| Largest diff. peak/hole / e Å <sup>-3</sup> | 2.76/-2.30                                                                                                   |

Section S4. Figures in supporting information.

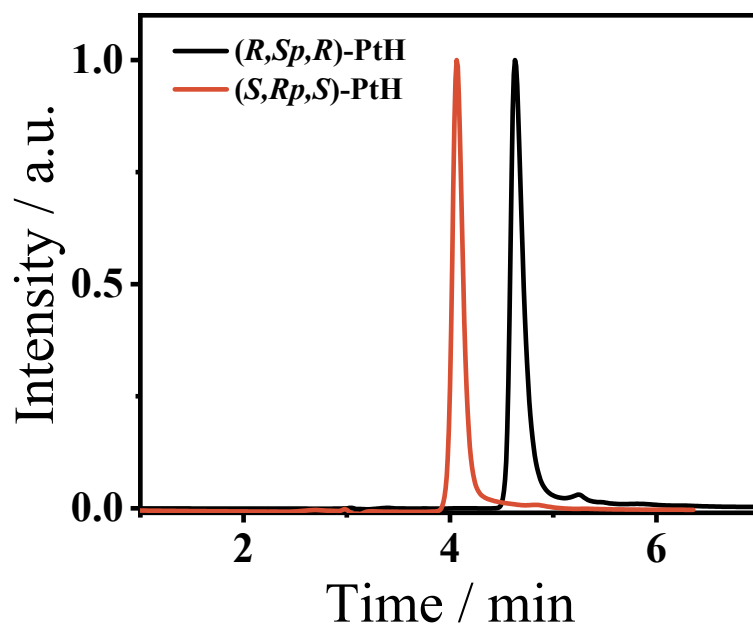

Figure S1. Chiral HPLC traces of  $(R,Sp,R)/(S,Rp,S)$ -PtH.

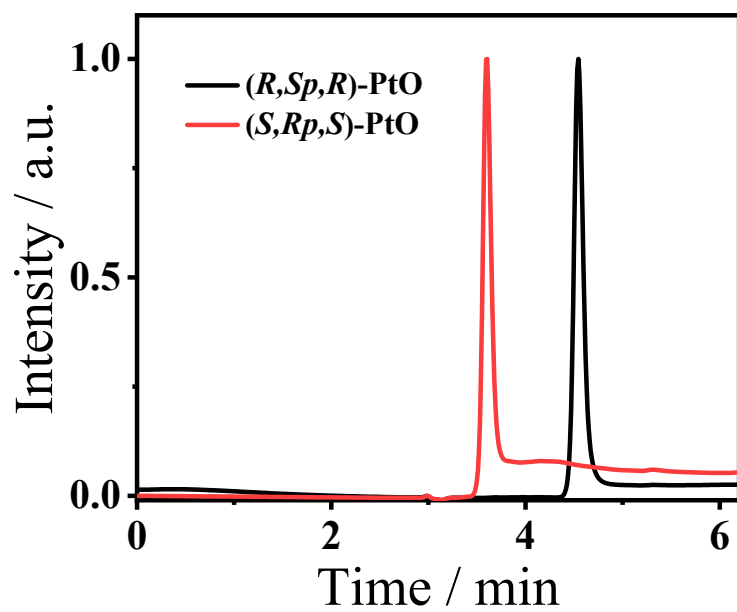

Figure S2. Chiral HPLC traces of  $(R,Sp,R)/(S,Rp,S)$ -PtO.

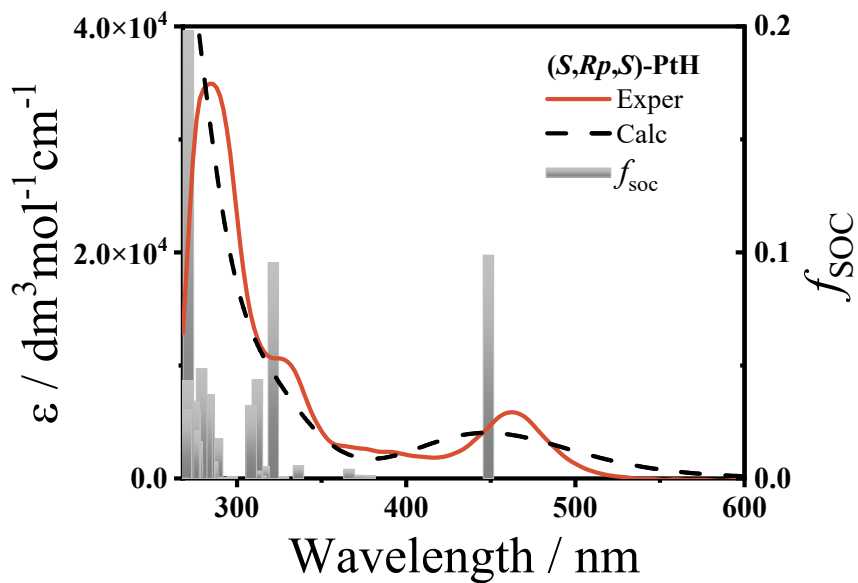

**Figure S3.** Experimental absorption ( $3.0 \times 10^{-5} \text{ mol dm}^{-3}$ ) and calculated absorption spectrum of  $(S,Rp,S)\text{-PtH}$  in DCM.

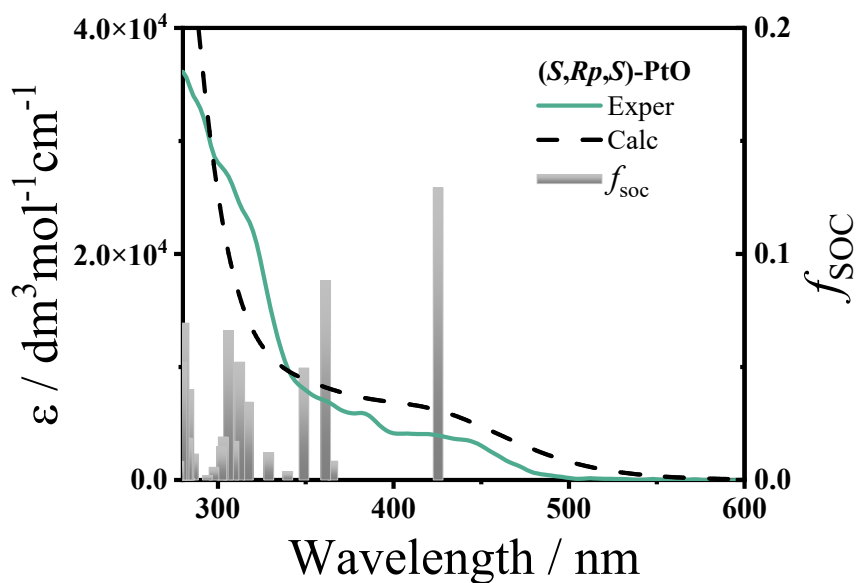

**Figure S4.** Experimental absorption ( $3.0 \times 10^{-5} \text{ mol dm}^{-3}$ ) and calculated absorption spectrum of  $(S,Rp,S)\text{-PtO}$  in DCM.

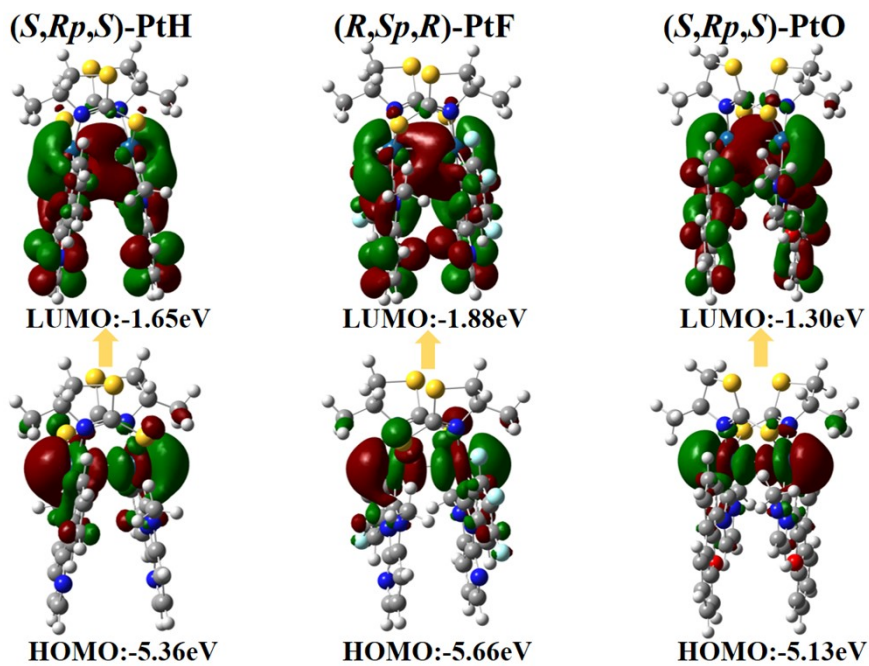

**Figure S5.** Energy level diagram and frontier molecular orbitals of  $(S,Rp,S)$ -PtH,  $(R,Sp,R)$ -PtF and  $(S,Rp,S)$ -PtO in DCM.

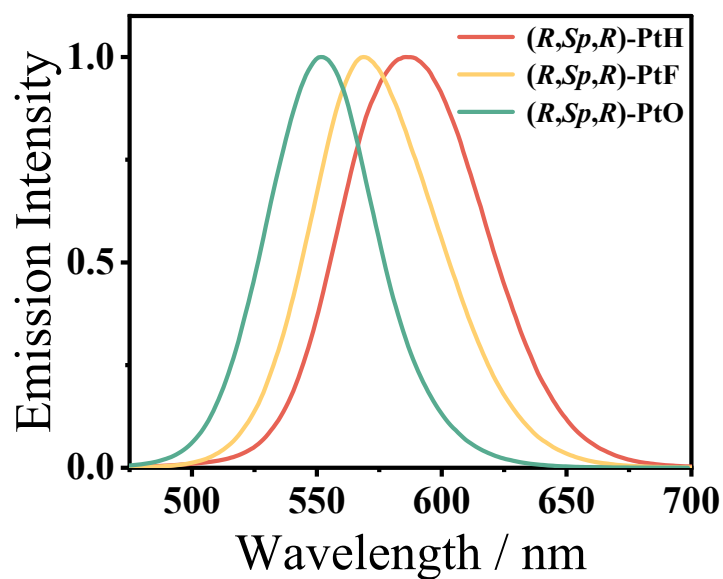

**Figure S6.** Normalized emission spectra of binuclear Pt(II) complexes in DCM ( $3.0 \times 10^{-5} \text{ mol dm}^{-3}$ ).

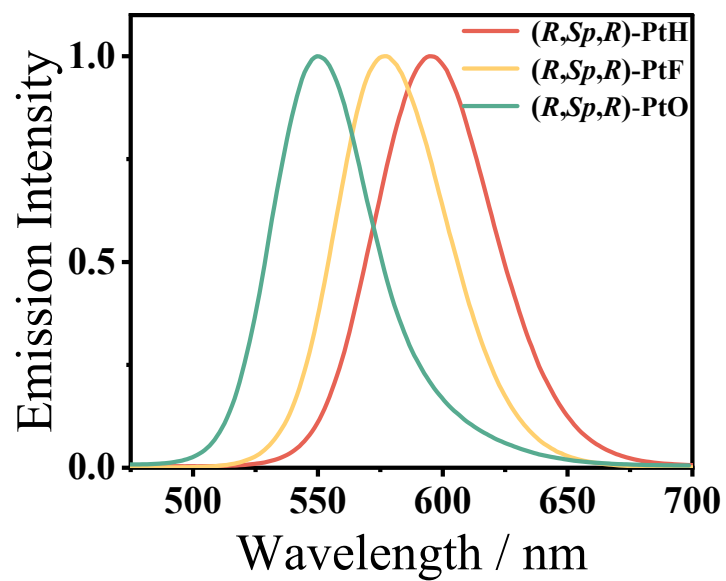

**Figure S7.** Normalized emission spectra of binuclear Pt(II) complexes in powder.

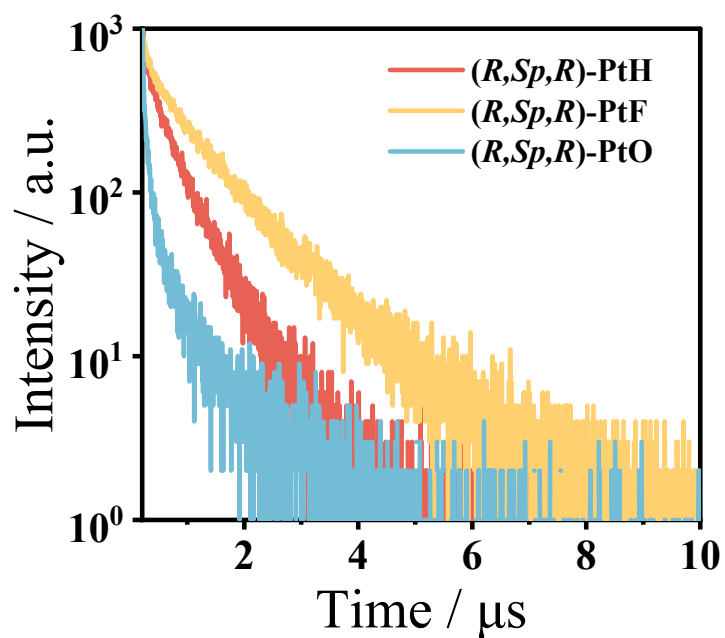

**Figure S8.** PL decay spectra of binuclear Pt(II) complexes in DCM ( $3.0 \times 10^{-5}$  mol  $\text{dm}^{-3}$ ).

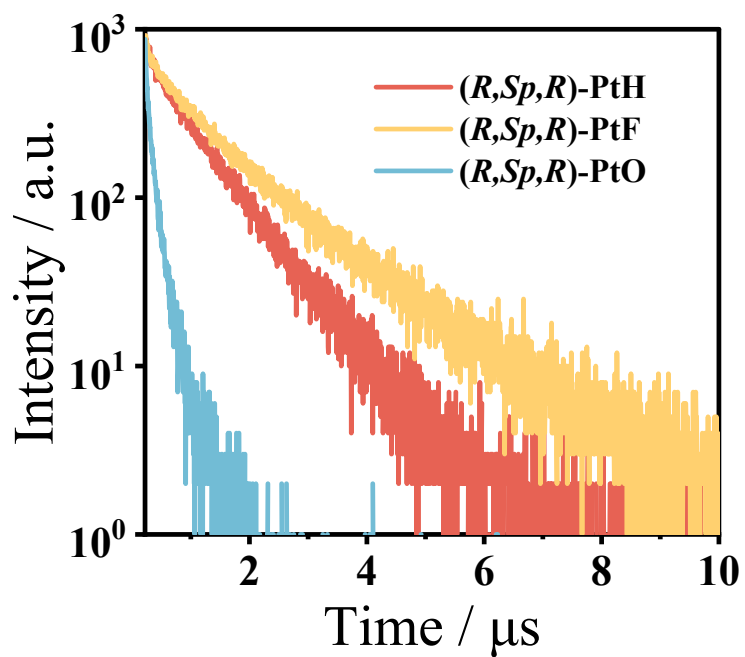

**Figure S9.** PL decay spectra of binuclear Pt(II) complexes in power.

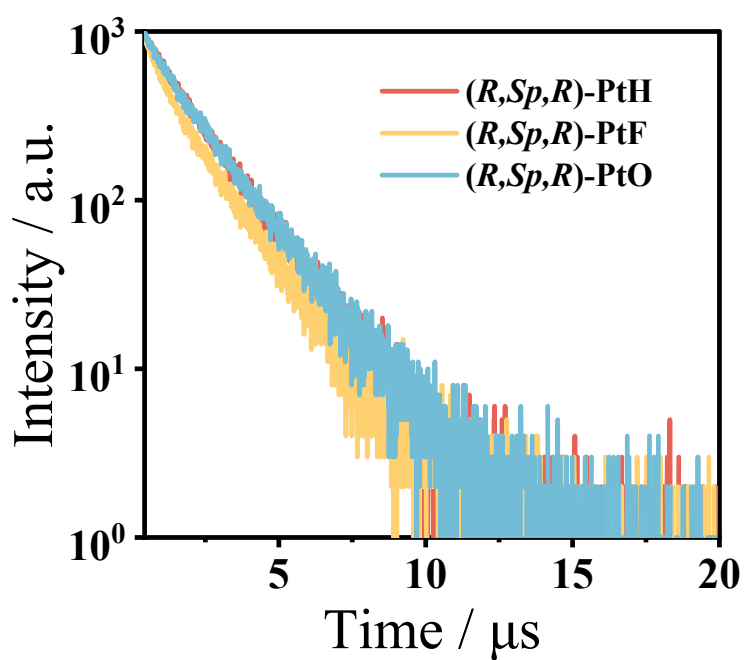

**Figure S10.** PL decay spectra of binuclear Pt(II) complexes in 5%-doped PMMA films.

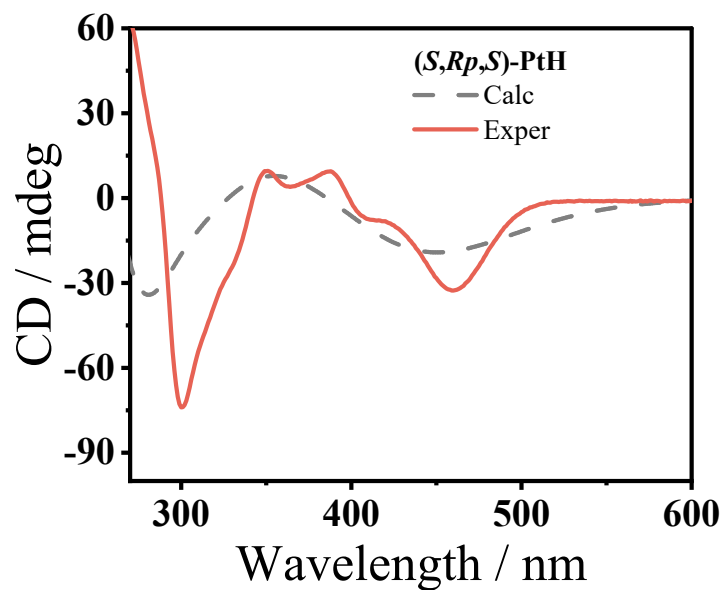

**Figure S11.** CD spectra of  $(S,Rp,S)$ -PtH in DCM ( $3.0 \times 10^{-5} \text{ mol dm}^{-3}$ ) and calculated CD spectra of  $(S,Rp,S)$ -PtH in DCM.

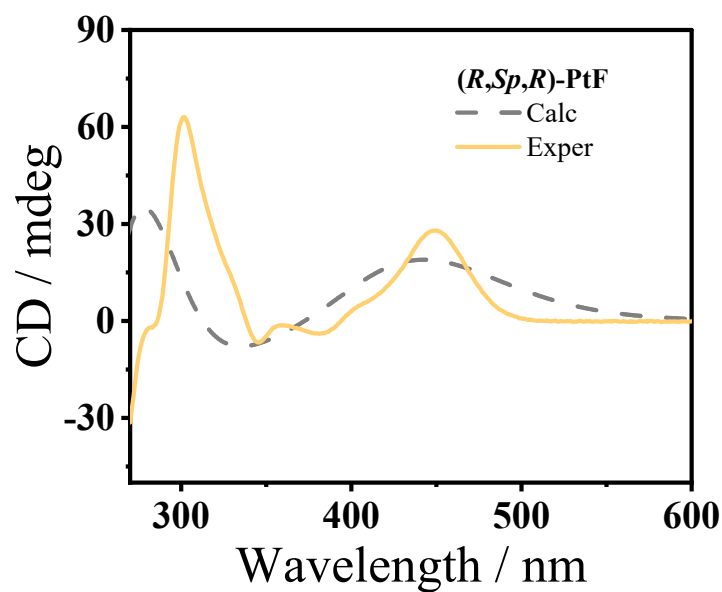

**Figure S12.** CD spectra of  $(R,Sp,R)$ -PtF in DCM ( $3.0 \times 10^{-5} \text{ mol dm}^{-3}$ ) and calculated CD spectra of  $(R,Sp,R)$ -PtF in DCM.

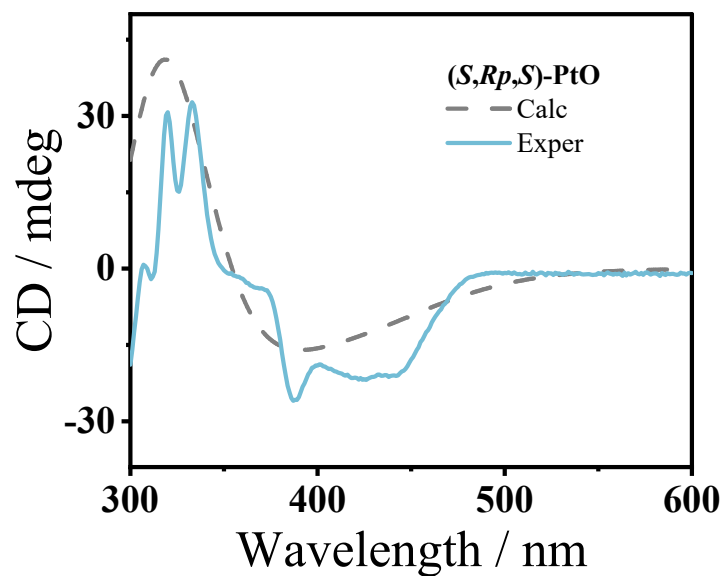

**Figure S13.** CD spectra of  $(S,Rp,S)$ -PtO in DCM ( $3.0 \times 10^{-5}$  mol dm<sup>-3</sup>) and calculated CD spectra of  $(S,Rp,S)$ -PtO in DCM.

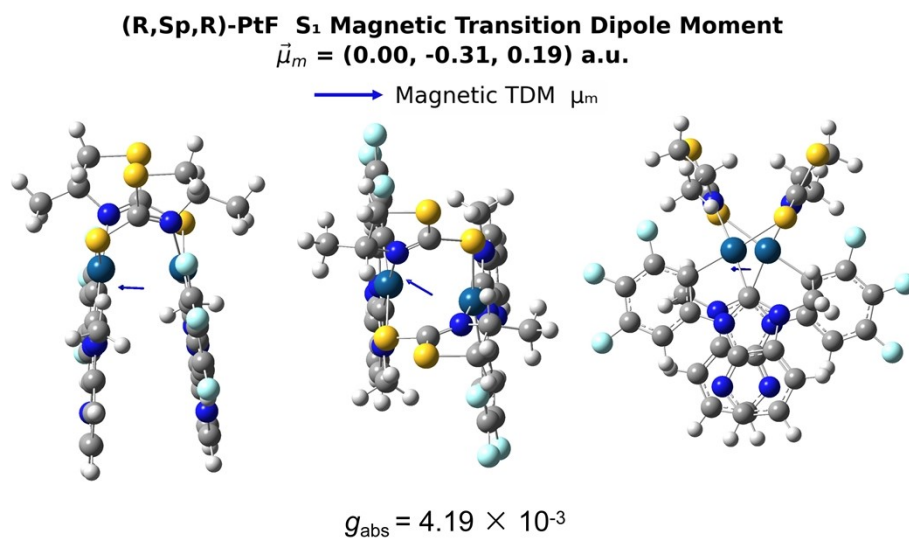

**Figure S14.** The magnetic transition dipole moment of  $(R,Sp,R)$ -PtF and the theoretical calculation of  $g_{abs}$ .

## Reference

- [1] N. Chen, W. Jia and J. Xu, *European J. Org. Chem.*, **2009**, 2009, 5841.
- [2] M. Xue, T. Lam, G. Cheng, W. Liu, K. Low, L. Du, S. Xu, F. Hung, D. L. Phillips and C. Che, *Adv. Opt. Mater.*, **2022**, 10, 2200741.
- [3] K. Lo, G. S. M. Tong, G. Cheng, K. Low, and C. Che, *Angew. Chemie Int. Ed.*, **2022**, 61, e202115515.
- [4] F. Wurl, S. Stipurin, J. I. Kollar and T. Strassner, *Angew. Chemie Int. Ed.*, **2023**, 62. e202301225.
